# Supplementary material for: The Black Mother-Daughter Developmental Model: A Life Course Framework for Understanding Matrescence, Attachment, and Relational Transformation in Black Families
Source: Research Square preprint supplement (doi:10.21203/rs.3.rs-6580883/v1), 2025-05-06
Supplement: Supplementary file 2 [file 2bdaba9f5a14fbb12bd1dcef.docx]

**Appendix**

**Table 1: Table of Participants**

| **Table 1**  *Summary of Participant Demographic Data* | | | | | | | | | | |
| --- | --- | --- | --- | --- | --- | --- | --- | --- | --- | --- |
|  | ID | Age | Current Location | Racial Identities | Gender Identities | Education Level of Participant | Education Level of Participant’s Mother | Socioeconomic Status in Childhood | Current  Household  Income | Age of Daughter(s) |
| 1 | 106 | 37 | Raleigh, North Carolina | African/African American/Black | Cisgender Woman | Postgraduate degree (e.g. MA, MS, PhD, MD) | Bachelor’s degree (e.g., BS, BA) | Working Class | $130,000-$149,000 | 13, 14.5 |
| 2 | 112 | 36 | Philadelphia, PA | African/African American/Black | Cisgender Woman | Postgraduate degree (e.g. MA, MS, PhD, MD) | Some high school or less | Poverty/Impoverished | $50,000-$89,999 | 13 |
| 3 | 114 | 38 | Staten Island, New York | African/African American/Black | Cisgender Woman | Postgraduate degree (e.g. MA, MS, PhD, MD) degree | Postgraduate degree (e.g. MA, MS, PhD, MD) | Working Class | $150,000+ | 8 |
| 4 | 115 | 37 | Dayton, Ohio | African/African American/Black  American  Indian/Native American | Cisgender Woman | Postgraduate degree (e.g. MA, MS, PhD, MD) | Bachelor’s degree (e.g., BS, BA) | Middle Class | $90,000-$129,999 | 5 |
| 5 | 142 | 32 | Huntsville, Alabama | African/African American/Black | Cisgender Woman | Bachelor’s degree (e.g., BS, BA) | Some College | Low Income | $20,000-$49,999 | 5 |
| 6 | 116 | 42 | Concord, North Carolina | African/African American/Black | Cisgender Woman | Postgraduate degree (e.g. MA, MS, PhD, MD) | Some College | Working Class | $50,000-$89,999 | 5 |
| 7 | 100 | 37 | College Station, Texas | African/African American/Black | Cisgender Woman | Postgraduate degree (e.g. MA, MS, PhD, MD) | Some high school or less | Poverty/Impoverished | $90,000-$129,999 | 6 |
| 8 | 102 | 39 | Greenville, South Carolina | African/African American/Black | Cisgender Woman | Postgraduate degree (e.g. MA, MS, PhD, MD) | Postgraduate degree (e.g. MA, MS, PhD, MD) | Working Class | $90,000-$129,999 | 11 |
| 9 | 103 | 38 | Raleigh, North Carolina | African/African American/Black | Cisgender Woman/Non-Binary | Postgraduate degree (e.g. MA, MS, PhD, MD) | Two year college degree (e.g., AA) | Working Class | $90,000-$129,999 | 11 |
| 10 | 107 | 35 | Clayton, North Carolina | African/African American/Black | Cisgender Woman | Postgraduate degree (e.g. MA, MS, PhD, MD) | Bachelor’s degree (e.g., BS, BA) | Middle Class | $130,000-$149,000 | 11, 8, 8 (twins) |
| 11 | 110 | 43 | Houston, Texas | African/African American/Black | Cisgender Woman | Bachelor’s degree (e.g., BS, BA) | Some College | Poverty/Impoverished | $150,000+ | 17 |
| 12 | 111 | 41 | Plano, Texas | African/African American/Black | Cisgender Woman | Postgraduate degree (e.g. MA, MS, PhD, MD) | Some college | Working Class | $50,000-$89,999 | 17 |
| 13 | 143 | 50 | Wilmer, Texas | African/African American/Black | Cisgender Woman | Some college | Some high school or less | Working Class | $50,000-$89,999 | 24, 22 |
| 14 | 147 | 47 | Binghamton, New York | African/African American/Black | Cisgender Woman | Postgraduate degree (e.g. MA, MS, PhD, MD) | Some college | Working Class | $130,000-$149,000 | 18 |
| 15 | 148 | 59 | Dallas, Texas | African/African American/Black | Cisgender Woman | Some postgraduate work | Two year college degree (e.g., AA) | Working Class | $50,000-$89,999 | 29 |
| 16 | 202 | 51 | Owings Mills, Maryland | African/African American/Black | Cisgender Woman | Postgraduate degree (e.g. MA, MS, PhD, MD) | Some high school or less | Low Income | $150,000+ | 28 |
| 17 | 205 | 61 | Hickory, North Carolina | African/African American/Black | Cisgender Woman | Postgraduate degree (e.g. MA, MS, PhD, MD) | High school diploma | Working Class | $90,000-$129,999 | 25 |
| 18 | 218 | 45 | Queens, New York | African/African American/Black | Cisgender Woman | Bachelor’s degree (e.g., BS, BA) | Some College | Working Class | $0 to $19,999 | 24, 5 |
