# Supplementary figures and images for: The Black Mother-Daughter Developmental Model: A Life Course Framework for Understanding Matrescence, Attachment, and Relational Transformation in Black Families
Source: Research Square preprint supplement (doi:10.21203/rs.3.rs-6580883/v1), 2025-05-06

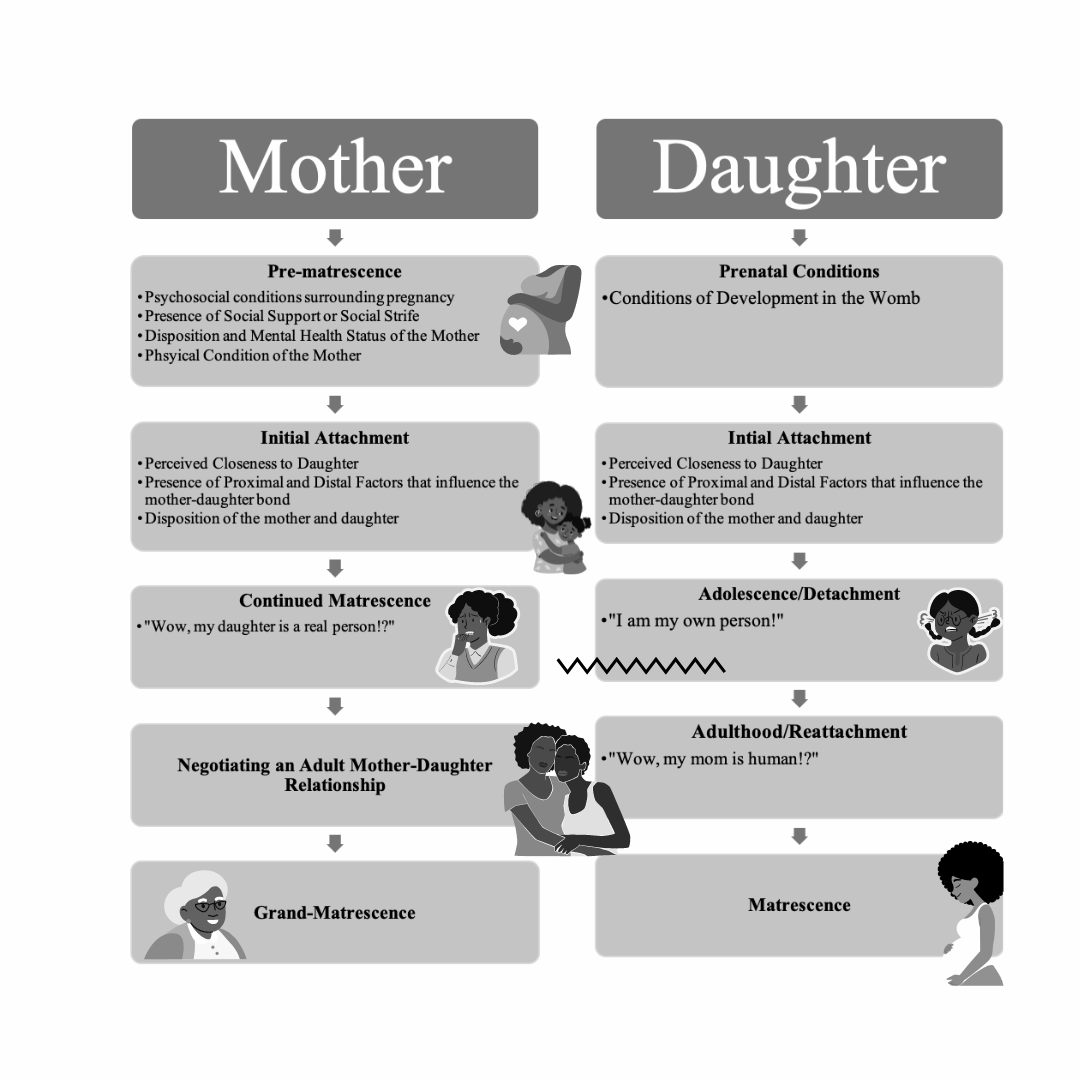


*Graphic 1: The Black Mother-Daughter Developmental Model* (BMDDM)

Supplement: Supplementary file 1 [file 172229f3f22e10f2346499b4.docx]
